# Supplementary material
Source: publisher site journal article supplement (https://www.dovepress.com/article/415414)
Supplement: Supplementary file 1 [file get_supplementary_file.php]

**I. Questionnaires**

Questionnaires for the prevalence, antimicrobial susceptibility pattern and associated factors of Group B Streptococcus among pregnant women attending antenatal care at Bule Hora University Teaching Hospital Participant ID ____________________

Date of interview and data collection (date/month/year): ________/ _____/_________ Interviewer’s name & signature: ____________________

Supervisor’s name & signature: ______________________

Participant code______________________________________

Age _____ years/months

001 Marital status  Single  Married  Divorced  Widowed

002 Residency  Urban  Rural

003 Educational status  No formal education  Grade 1-8  Grade 9-12  College and University

004 Occupation  Employed  Unemployed

005 Gravidity  Primigravid  Multigravid

006 Number of ANC visits _____________

007 History of contraceptive use  Yes  No 008 History of antibiotics use  Yes 42  No

009 HIV status of mother  Yes  No

010 History of stillbirth  Yes  No

011 History of abortion  Yes  No

012 Vaginal discharges  Yes  No

013 History of preterm delivery  Yes  No

014 History of Premature rupture of  Yes membrane  No

**II. Laboratory procedures**

**Laboratory protocol**

• Provide written consent form for pregnant women willing to participate in the study before sample collection

• Collection of clinical data from physician/midwives

• Socio-demographic data will be collected with a well-standardized questionnaire

**Specimen collection**

1. The patient is positioned in a lithotomy position on the exam table (as for a pelvic examination).

2. Using sterile cotton swabs to obtain a sample of vaginal discharge without use of a speculum. The fluid specimen can be obtained directly from the mucosa of the lower vagina. Laboratory Procedures for Group B streptococcus

**1. Gram staining Principles**

The principle of Gram’s stain is that cells are first fixed to slide by heat or alcohol and stained with a basic dye (e.g., crystal violate), which is taken up in similar amounts by all bacteria. The slides are then treated with a Gram’s iodine (iodine KI mixture) to fix (mordant) the crystal violet stain on Gram positive bacteria, decolorized with acetone or alcohol, and finally counter stained with Safranin. Reagents Used in Gram Staining

• Crystal Violet, the primary stain • Iodine, the mordant • A decolorizer made of acetone and alcohol (95%) • Safranin, the counterstain The procedure of Gram Staining

1. Take a clean, grease-free slide.

2. Prepare the smear from the colony growth.

3. Air dry and heat fix.

4. Crystal Violet was poured and kept for about 30 seconds to 1 minute and rinsed with water.

5. Flood the gram’s iodine for 1 minute and wash with water.

6. Then, wash with 95% alcohol or acetone for about 10-20 seconds and rinse with water.

7. Add safranin for about 1 minute and wash with water.

8. Air dry and observe under the Microscope.

**Interpretation**

- Gram Positive: Blue/Purple Color
- Gram Negative: Red Color

**2. Biochemical test**

A. Catalase test. This test is used to differentiate those bacteria that produce the enzyme catalase Staphylococci from non-catalase-producing bacteria Streptococci. Principle: Catalase acts as a catalyst in the breakdown of hydrogen peroxide to oxygen and water. An organism is tested for catalase production by bringing it in to contact with hydrogen peroxide. Bubbles of oxygen are released if the organism is a catalase producer. The culture should not be more than 24 hours old Procedure

**Slide Method**

1. Use a loop or sterile wooden stick to transfer a small amount of colony growth in the surface of a clean, dry glass slide. 46

2. Place a drop of 3% H O in the glass slide. 2 2

3. Observe for the evolution of oxygen bubbles

Results Active bubbling ----- Positive test- Catalase produced No release of bubbles ----- Negative test - No catalase produced Quality Control strains for catalase test Positive: Staphylococcus aureus– ATCC 33592 Negative: Enterococcus faecalis– ATCC 29212 B. CAMP Test: The CAMP test is used to distinguish the species Streptococcus agalactiae from other species of beta-hemolytic Streptococcus. Principle A CAMP (Christite, Atkins, Munch, Petersen) test is considered a presumptive identification of a positive GBS culture. In short, Staphylococcus aureus will be inoculated onto the SBA plate by making a narrow streak down the center of the plate with a loop. Then, the test organism (GBS) will be streaked in a straight-line inoculum at right angles to Staphylococcus aureus within 2mm. Then, the plate will be incubated at 35°C for 24 hours. A positive CAMP test will be identified by an “arrowhead” shaped enhanced zone of beta-hemolysis in the area between the two cultures with the “arrow point” toward the S. aureus streak. In a CAMP negative reaction, no enhanced zone of beta-hemolysis will be observed. In addition, the bacitracin test will be used to differentiate GBS from group A streptococcus which is both beta-hemolytic. Then, antibiotic susceptibility testing of S. agalactiae isolates will be measured and the result will be interpreted following the guidelines of the Clinical and Laboratory Institute Standards (CLSI).

The procedure of the CAMP test

1. Streak a beta-lysin–producing strain of S. aureus down the center of a sheep blood agar plate. 2. The streptococcal streak should be 3 to 4 cm long. 47

3. Streak test organisms across the plate perpendicular to the S. aureus streak within 2 mm. (Multiple organisms can be tested on a single plate).

4. Incubate at 35°-37°C in ambient air for 18-24 hours.

5. Group B streptococci and a few other beta-streptococci produce an enhancement of the ß-lysin activity of the aureus strain.

**Result Interpretation of the CAMP test**

**Positive:** Enhanced hemolysis is indicated by an arrowhead-shaped zone of beta-hemolysis at the junction of the two organisms.

**Negative**: No enhancement of hemolysis.

**Quality Control for CAMP test**

Positive: Streptococcus agalactiae (ATCC13813)-enhanced arrowhead hemolysis. Negative: Streptococcus pyogenes (ATCC19615)-beta-hemolysis without enhanced arrowhead formation.

**Antimicrobial Susceptibility Test:** (Kirby Bauer, 1966 Method)

Antimicrobial susceptibility testing will be performed in line with Clinical and Laboratory Standard Institute guidelines (CLSI, 2014) by disk diffusion. A suspension of a testing organism will be prepared by removing 3-5 colonies from a pure culture plate by emulsifying in 3ml of sterile physiological saline and can be diluted with saline until the turbidity of the suspension becomes matched with the turbidity standard corresponding to 0.5 McFarland and inoculated on Muller-Hinton Agar (MHA, Oxoid, England) with 5% sheep’s blood. After excess suspension will be removed by gentle rotation of the swab against the surface of the tube, the swab will then use to distribute the bacteria evenly over the whole surface of MHA supplemented with 5% sheep blood.

**Materials**

• MHA, Tryptic Soy Broth (TSB), Normal Saline Solution (NSS)

• Antimicrobial disks

• 0.5 McFarland Standard 48

• Sterile cotton swabs

• Ruler or caliper Specimen Pure culture of the organisms from an 18–24-hour agar plate, preferably a nonselective medium like sheep blood agar.

**Procedure**

1. Bring agar plates and antibiotic disks to room temperature before use.

2. Select 3 – 5 well-isolated colonies of the same morphologic type from an agar plate culture. 3. Touch the top of each colony with a loop and transfer the growth into a tube containing 4- 5 ml of TSB or NSS.

4. Mix well and adjust turbidity with broth or NSS to match 0.5 McFarland standard.

5. Within 15 minutes of adjusting turbidity, dip a sterile cotton-tipped applicator swab into the inoculum and rotate against the wall of the tube to remove excess inoculum.

6. Swab the entire surface of the agar plate three times, rotating the plate approximately 60 between streaking to ensure even distribution. As a final step, swab the rim of the agar.

7. Allow the inoculated plate to stand for 3-15 minutes (no longer than 15 minutes) before applying disks.

8. Apply antibiotic disks to the agar surface using sterile forceps or a dispenser. Apply gentle pressure to ensure complete contact of the disk with the agar.

9. Do not relocate a disk once it has made contact with the agar surface. Instead, place a new disk in another location on the agar.

10. Place no more than 12 disks on a 150 mm plate and no more than 5 disks on a 100 mm plate. 11. Plate and incubate within 15 minutes of disk application. Incubate for 16 – 18 hours at 35± 2 in an ambient air incubator

**Reading and Interpretation**

Read plates only if the lawn of growth is confluent.

If individual colonies are apparent, the inoculum will be too light and the test must be repeated.

• Hold the inverted plate a few inches above a black non-reflecting surface. Illuminate plate with reflected light.

• Use a ruler held on the back of the plate to measure the diameter of the zone of inhibition. • Measure the diameters of the zones of complete inhibition (as judged by the unaided eye), including the diameter of the disk. Ignore the faint growth of tiny colonies that can be detected only with a magnifying lens at the edge of the inhibited growth.

• Measure the zones to the nearest millimeter (mm).

• Refer to CLSI M100 tables for interpretation of zone sizes.

Reporting

• Report the organisms as either Susceptible (S), Intermediate (I), or Resistant (R) to the antimicrobial agents that will be tested.
